# Supplementary material for: Fire-adapted Gondwanan Angiosperm floras evolved in the Cretaceous
Source: PubMed Central journal article supplement (PMC3534566; doi:10.1186/1471-2148-12-223), 2012-11-22

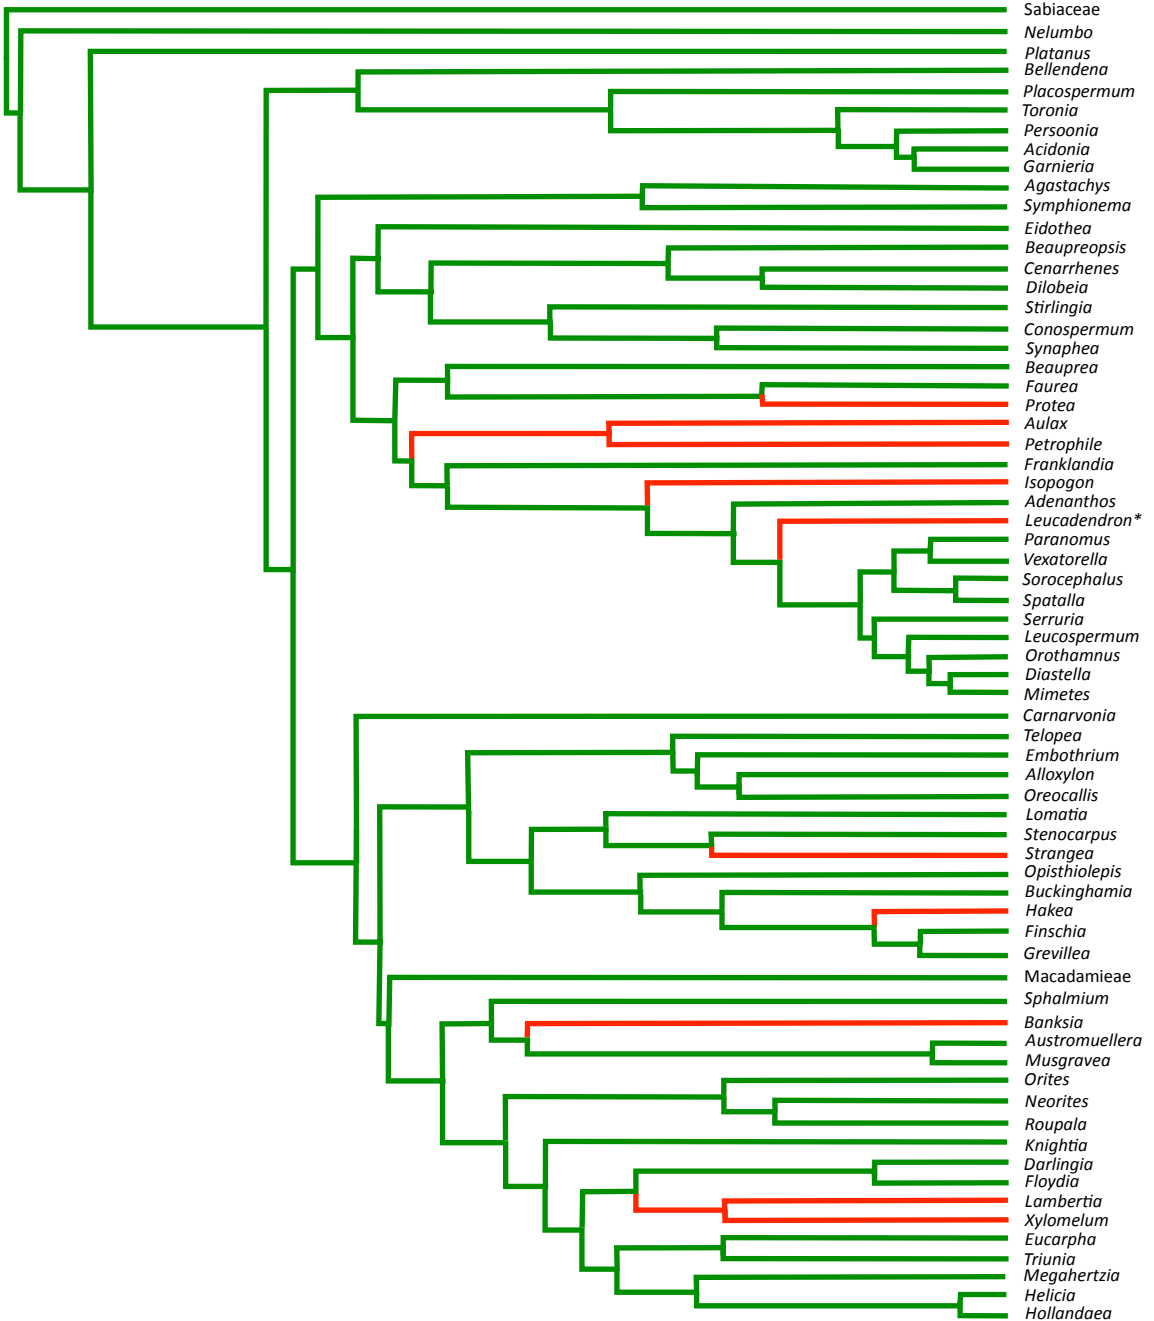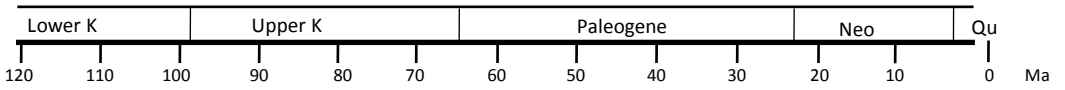

Supplement: 1471-2148-12-223-S1.pdf [file 1471-2148-12-223-S1.pdf]
